# Supplementary material for: Air quality in the eastern United States and Eastern Canada for 1990–2015: 25 years of change in response to emission reductions of SO 2 and NO x in the region
Source: Copernicus journal article supplement (doi:10.5194/acp-2019-567), 2019-08-15
Supplement: Supplementary file 1 [file acp-2019-567-supplement.pdf]

*Supplement of*

**Air quality in the eastern United States and Eastern Canada for 1990-2015: 25 years of change in response to emission reductions of SO<sub>2</sub> and NO<sub>x</sub> in the region**

**Jian Feng et al.**

*Correspondence to:* Jian Feng ([jian.feng@canada.ca](mailto:jian.feng@canada.ca))

To have a best view of the graphs, it is recommended to zoom the document to 200-300% within Microsoft® Word. The graphs inserted into this document are in PNG format. They can be zoomed in to a larger size without losing resolution.

(a) Warm season

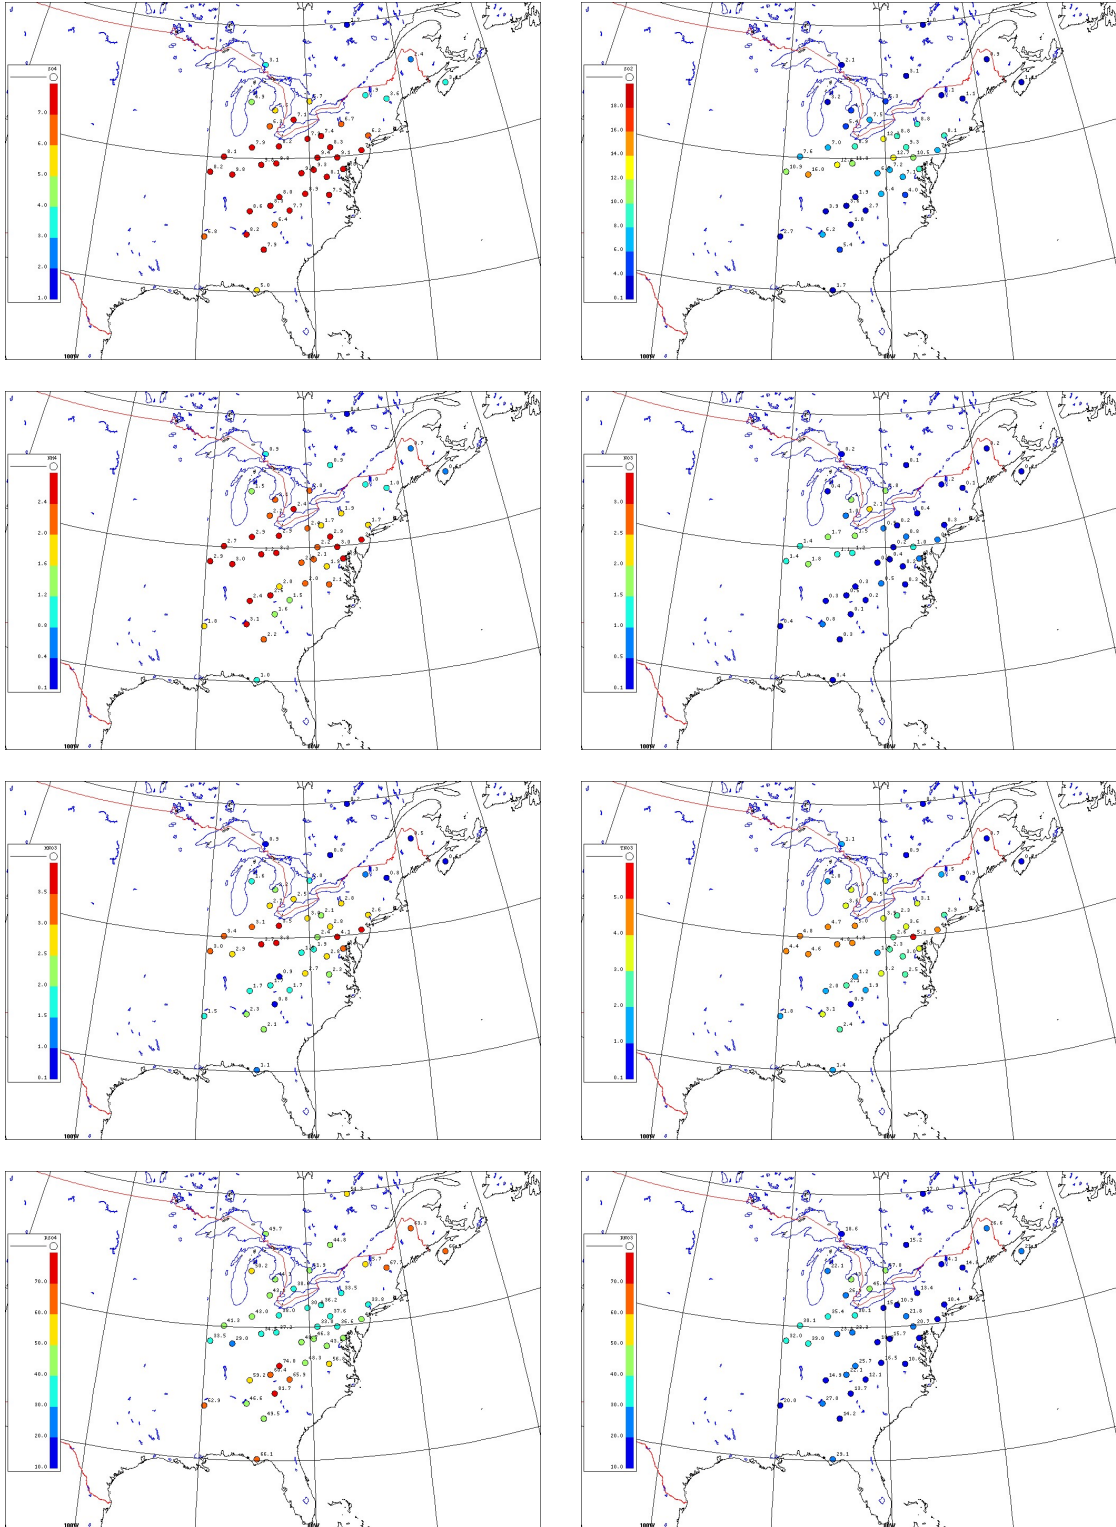

(b) Cold season

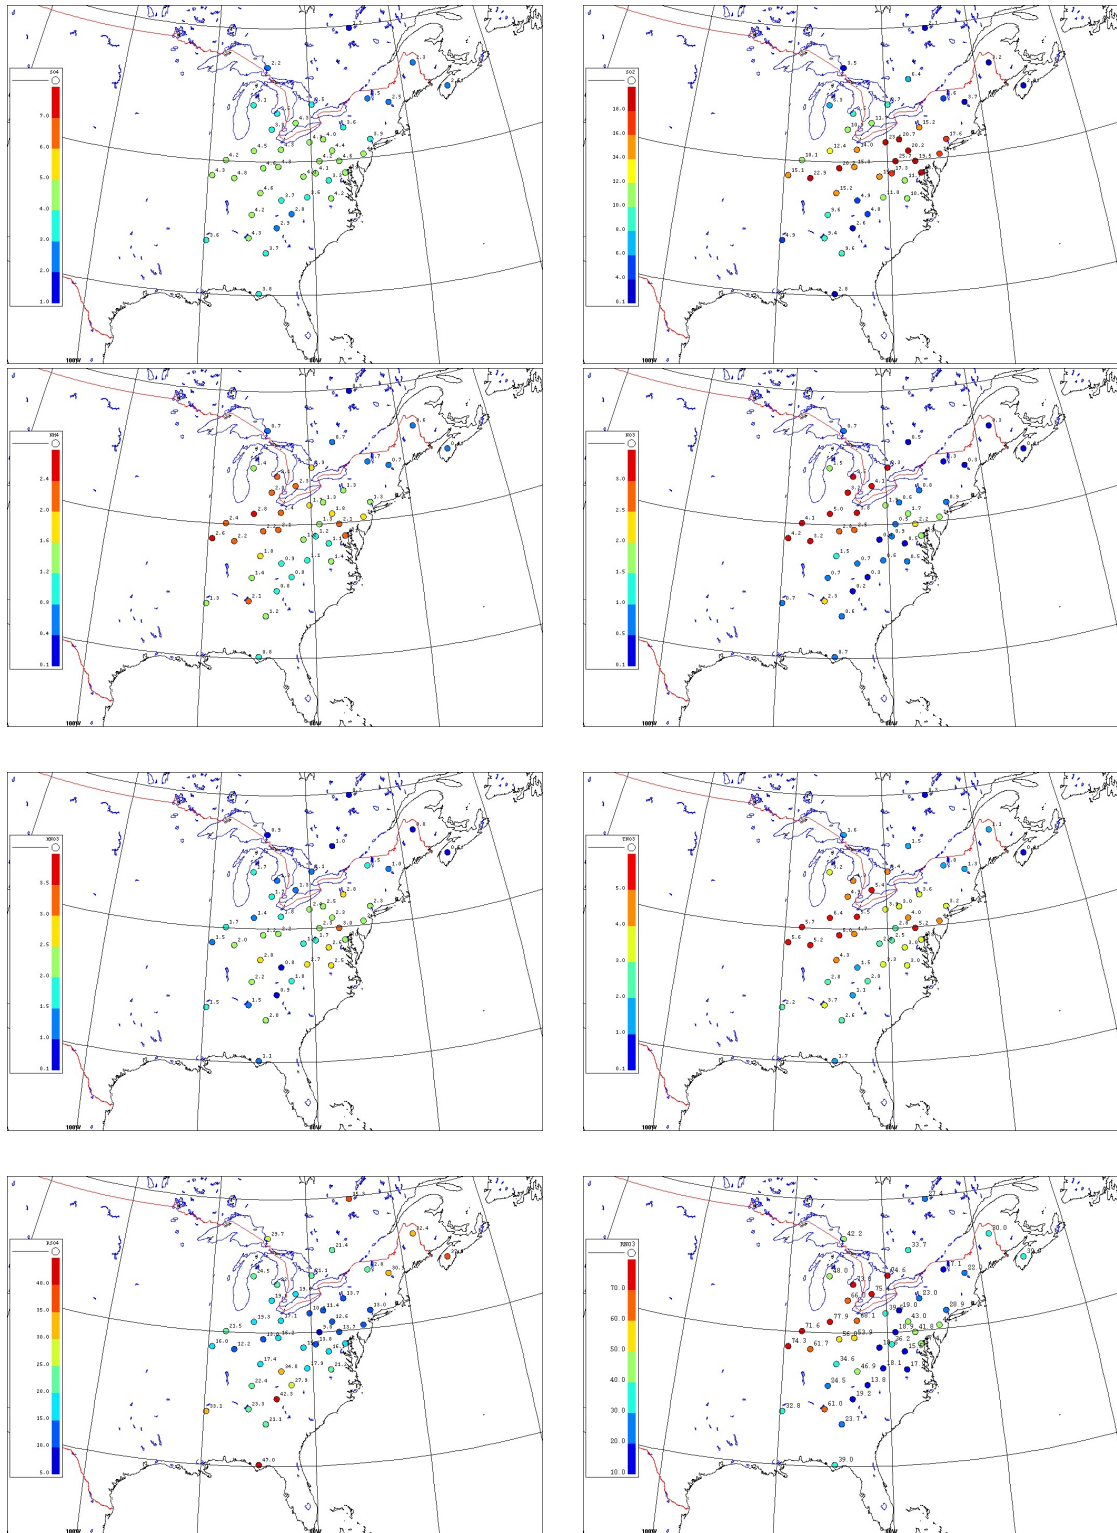

Fig. S1 Mean air concentrations ( $\mu\text{g m}^{-3}$ ) of  $\text{SO}_2$ ,  $\text{SO}_4^{2-}$ ,  $\text{NO}_3^-$ ,  $\text{HNO}_3$ ,  $\text{TNO}_3$  and  $\text{NH}_4^+$ , and mean ratios of  $\text{RSO}_4$  (%) and  $\text{RNO}_3$  (%) during 1989-1991 for (a) warm season and (b) cold season.

(a) Warm season

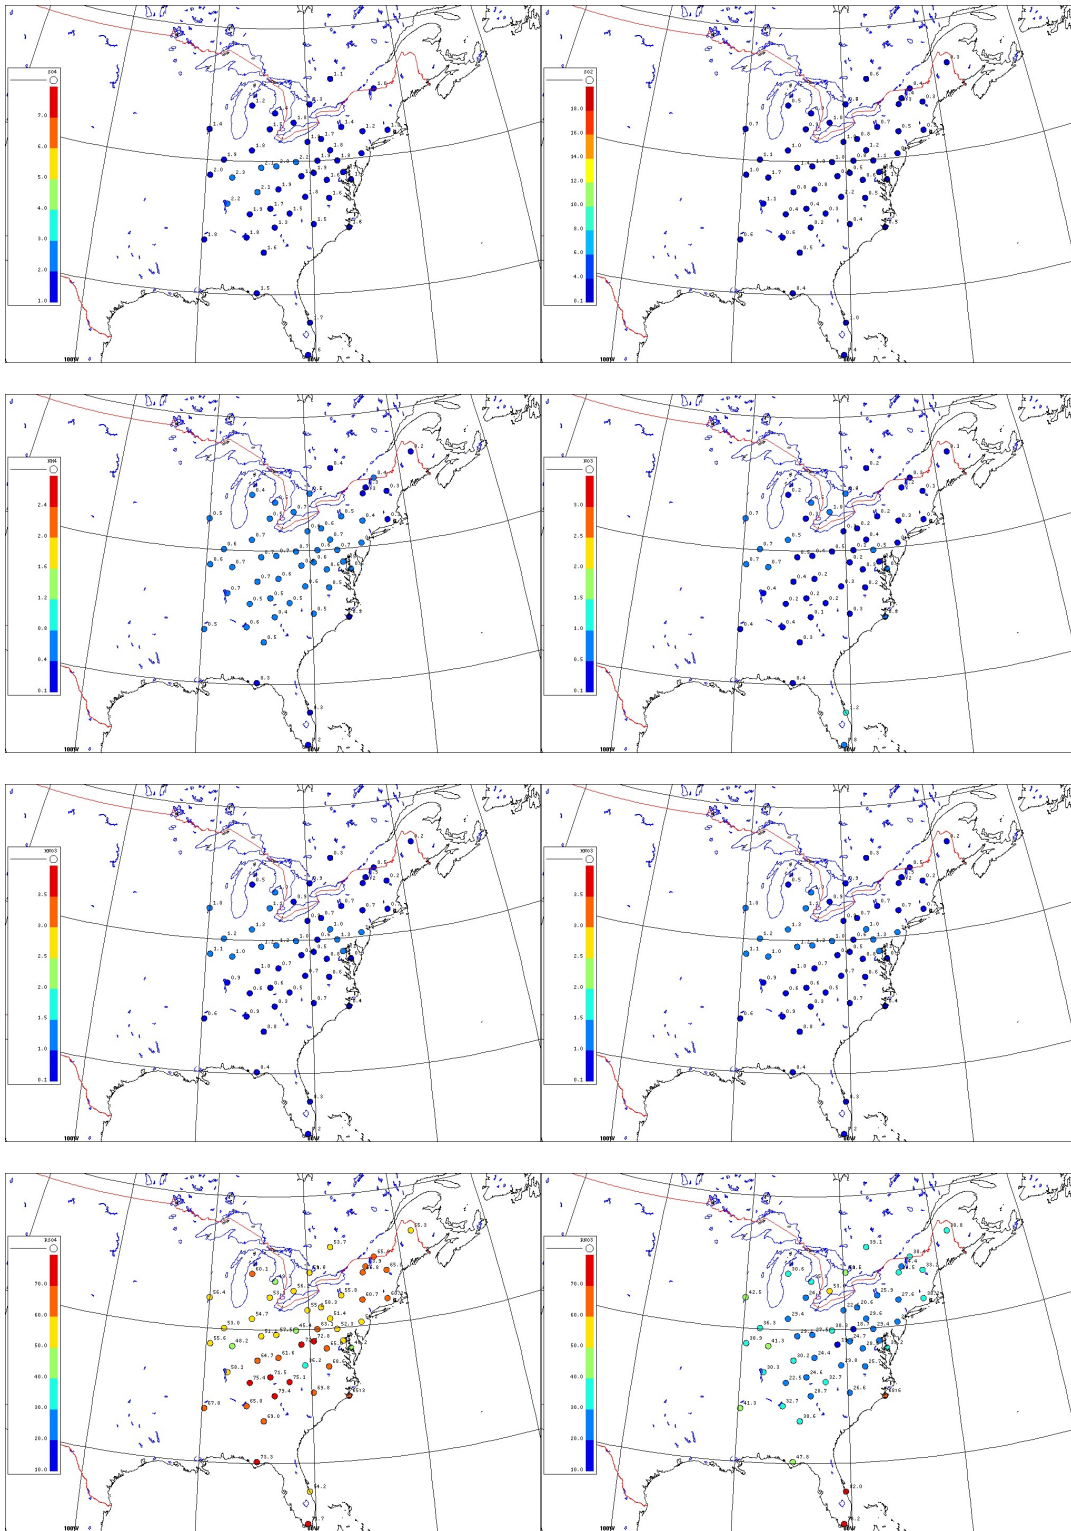

(b) Cold season

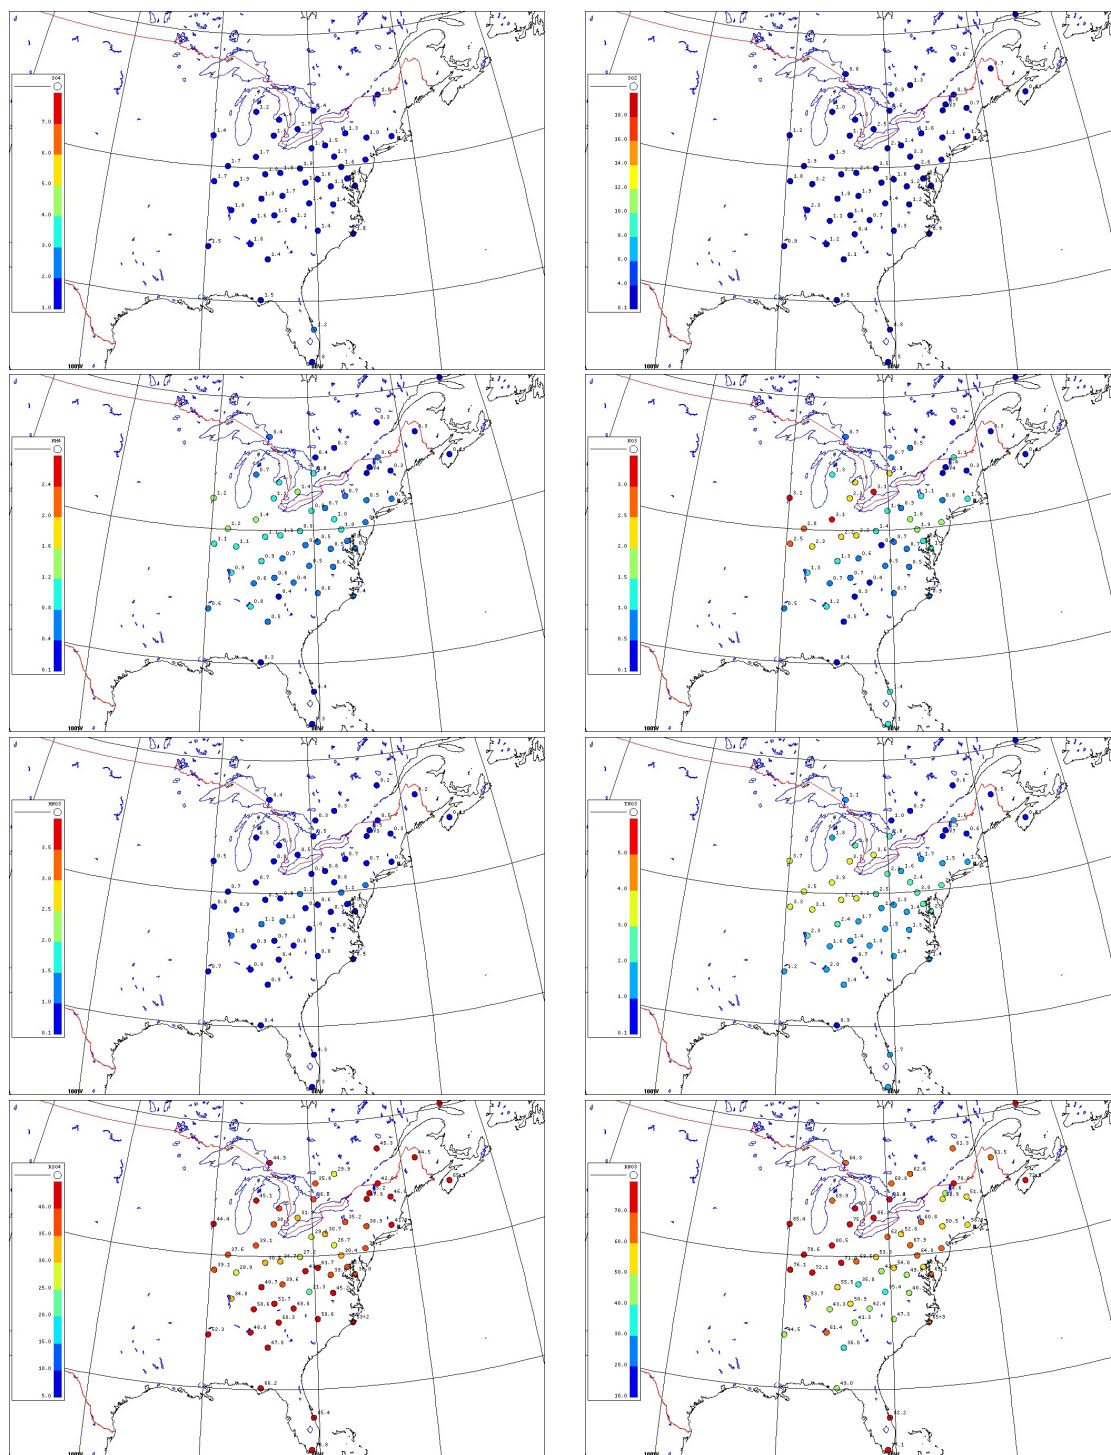

Fig. S2 Mean air concentrations ( $\mu\text{g m}^{-3}$ ) of  $\text{SO}_2$ ,  $\text{SO}_4^{2-}$ ,  $\text{NO}_3^-$ ,  $\text{HNO}_3$ ,  $\text{TNO}_3$ , and  $\text{NH}_4^+$ , and mean ratios of  $\text{RSO}_4$  (%) and  $\text{RNO}_3$  (%) during 2014-2016 for (a) warm season and (b) cold season.

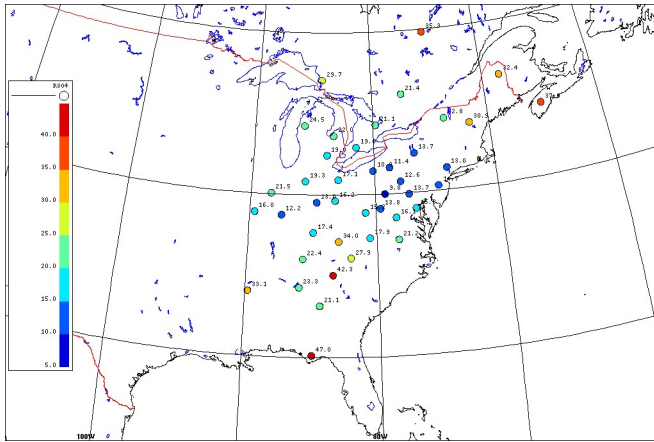

1989-1991

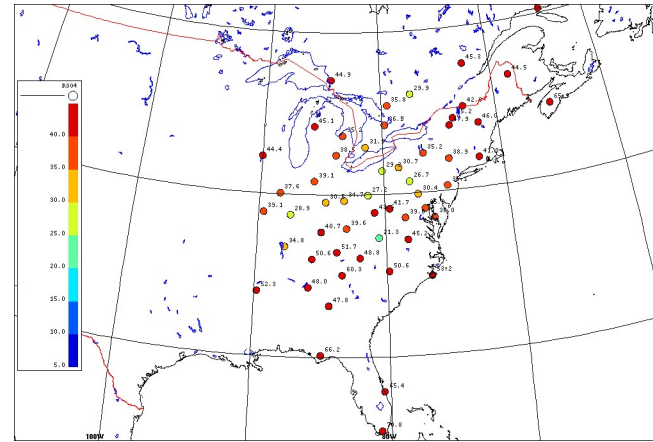

2014-2016

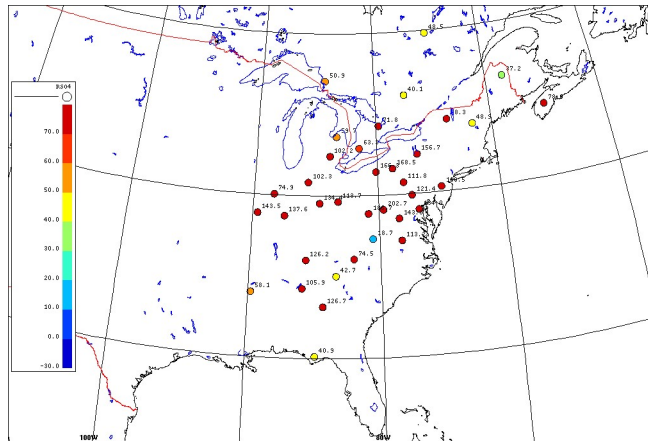

Change of RSO<sub>4</sub> (%): 2014-2016 vs. 1989-1991

(a) Cold season

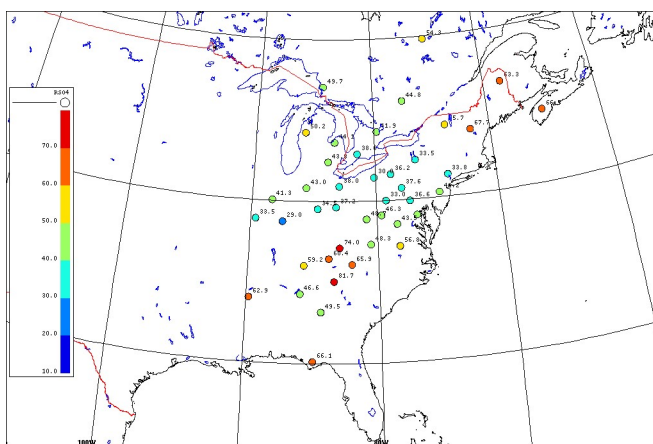

1989-1991

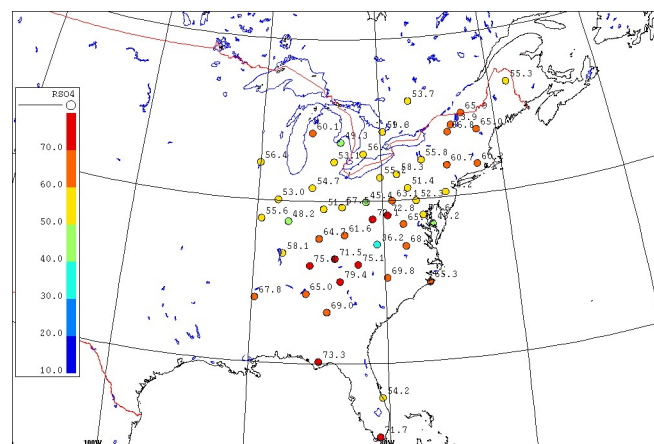

2014-2016

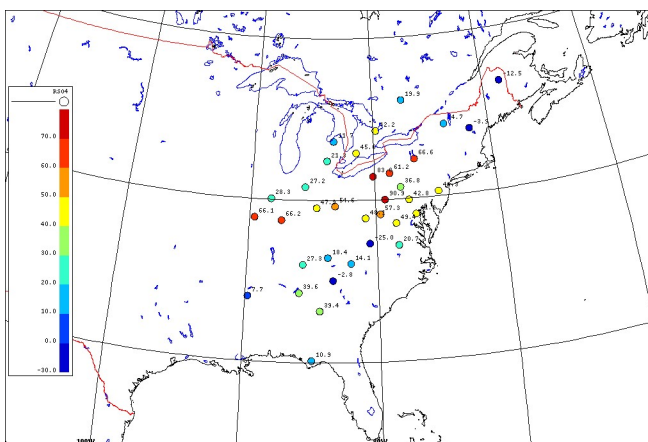

Change of RSO<sub>4</sub> (%): 2014-2016 vs. 1989-1991

(b) Warm season

Fig. S3 RSO<sub>4</sub> of 1989-1991 and 2014-2016, and the change of RSO<sub>4</sub> : 2014-2016 vs. 1989-1991.



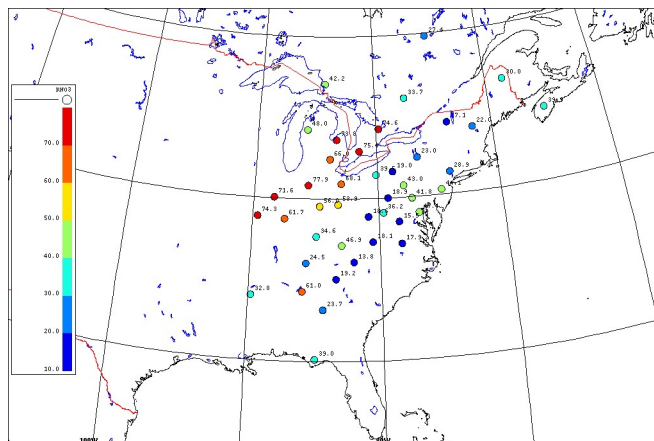

1989-1991

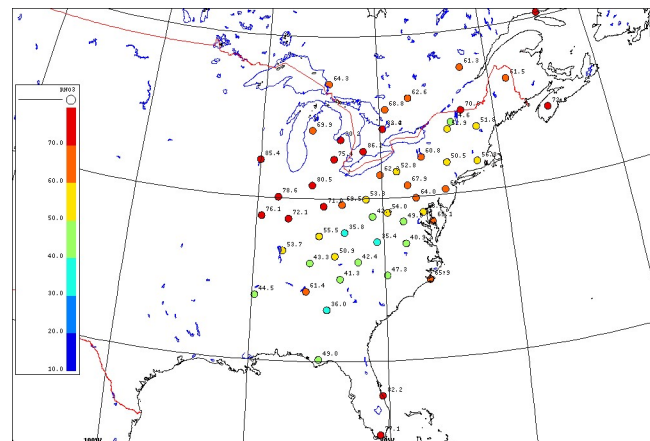

2014-2016

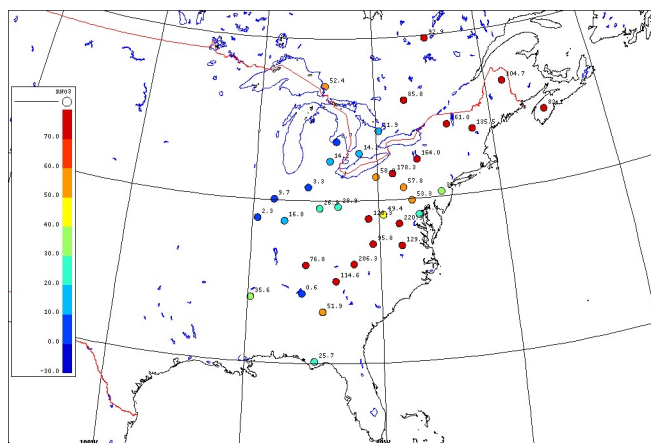

Change of  $\text{RNO}_3$ : 2014-2016 vs. 1989-1991

(a) Cold season

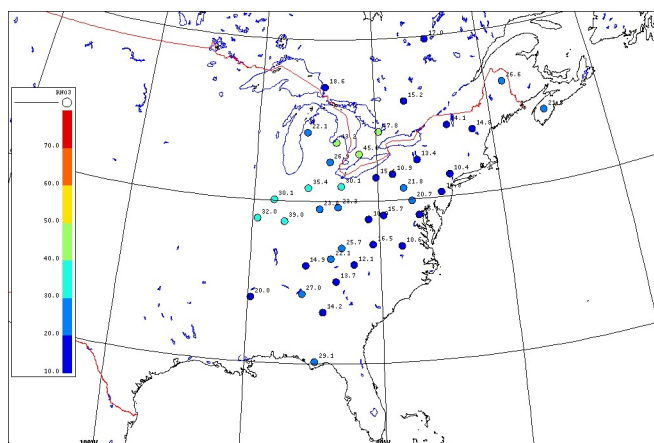

1989-1991

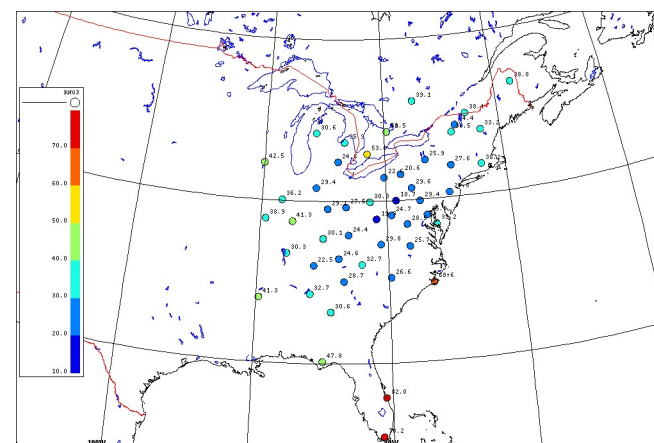

2014-2016

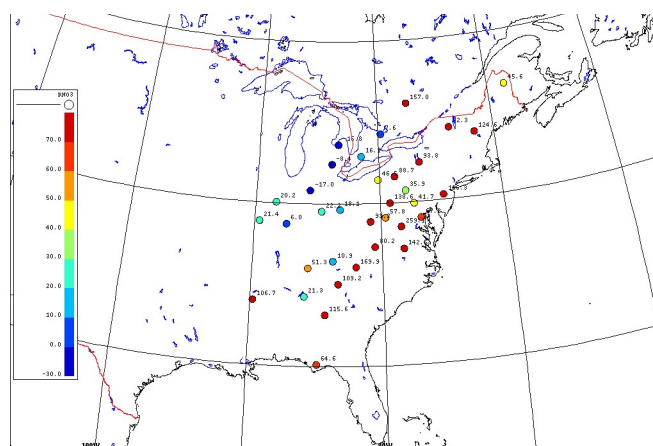

Change of RNO<sub>3</sub>: 2014-2016 vs. 1989-1991

(b) Warm season

Fig. S4 RNO<sub>3</sub> of 1989-1991 and 2014-2016, and change of RNO<sub>3</sub>: 2014-2016 vs. 1989-1991

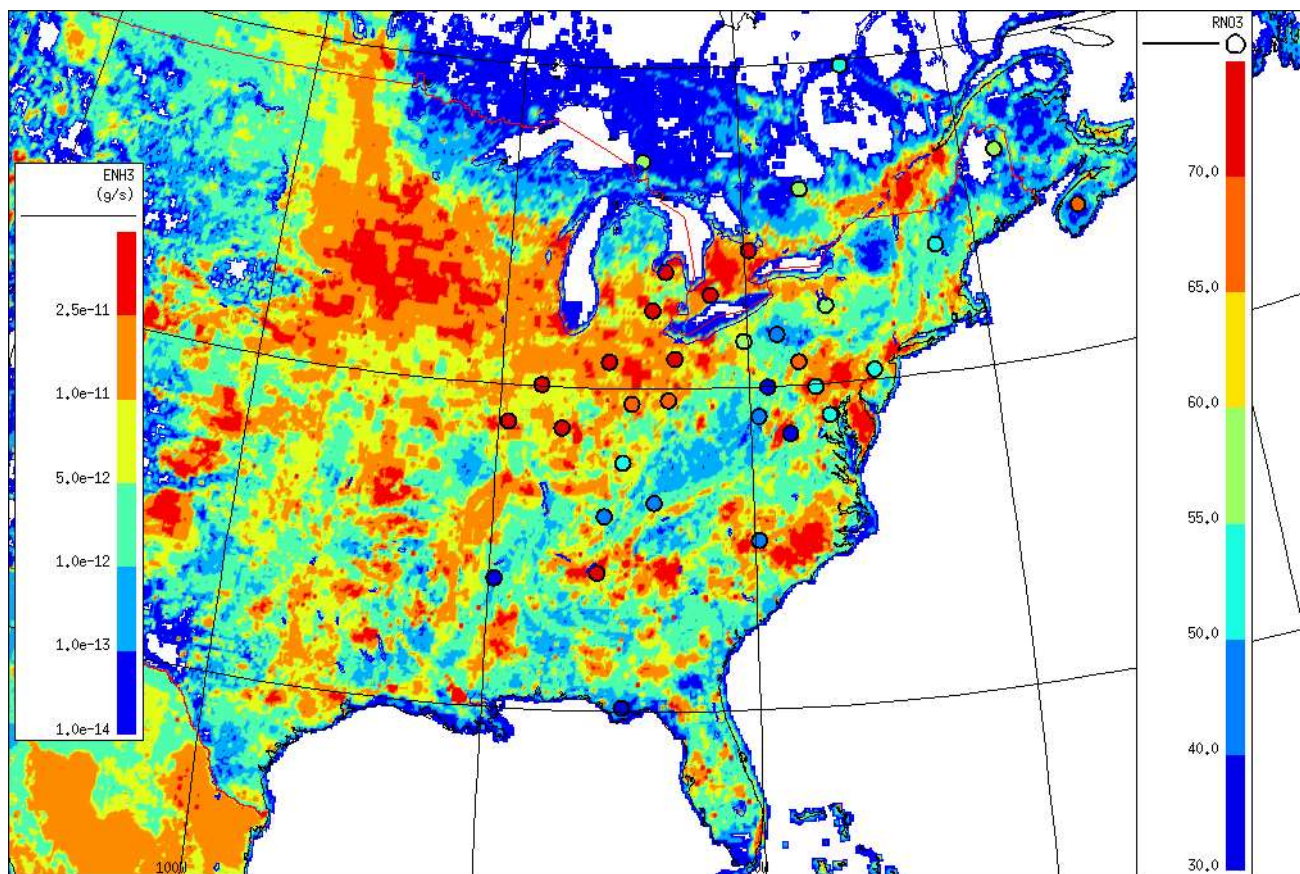

Fig. S5 Overlap of NH<sub>3</sub> emission rate for December 2010 from HTAP with RNO<sub>3</sub> (%) for the cold season of 2010.

TableS1. 3 years' averages of air concentrations ( $\mu\text{g m}^{-3}$ ),  $\text{RSO}_4$  (%) and  $\text{RNO}_3$  (%) for 1989-1991 (a) Warm season

| Region     | STN         | $\text{SO}_4^{2-}$ | $\text{NO}_3^-$ | $\text{NH}_4^+$ | $\text{HNO}_3$ | $\text{SO}_2$ | $\text{TNO}_3$ | $\text{RSO}_4$ | $\text{RNO}_3$ |
|------------|-------------|--------------------|-----------------|-----------------|----------------|---------------|----------------|----------------|----------------|
| 1          | ALG100      | 3.11               | 0.21            | 0.87            | 0.90           | 2.12          | 1.10           | 49.73          | 18.59          |
|            | CHA100      | 3.68               | 0.13            | 0.94            | 0.76           | 3.14          | 0.87           | 44.84          | 15.22          |
|            | CPS100      | 1.66               | 0.04            | 0.37            | 0.22           | 0.97          | 0.26           | 54.27          | 17.02          |
|            | KEJ100      | 3.13               | 0.16            | 0.59            | 0.58           | 1.06          | 0.72           | 66.52          | 21.75          |
|            | ASH135      | 2.42               | 0.18            | 0.65            | 0.52           | 0.94          | 0.69           | 63.27          | 26.63          |
|            | WST109      | 3.56               | 0.13            | 0.97            | 0.76           | 1.15          | 0.88           | 67.65          | 14.79          |
|            | <b>AVE</b>  | <b>2.93</b>        | <b>0.14</b>     | <b>0.73</b>     | <b>0.62</b>    | <b>1.56</b>   | <b>0.75</b>    | <b>57.71</b>   | <b>19.00</b>   |
|            | STD         | 0.76               | 0.06            | 0.24            | 0.24           | 0.89          | 0.28           | 9.47           | 4.51           |
| 2          | EGB100      | 5.67               | 1.78            | 2.00            | 1.97           | 5.29          | 3.72           | 41.94          | 47.85          |
|            | LON100      | 7.09               | 2.07            | 2.42            | 2.50           | 7.49          | 4.53           | 38.63          | 45.63          |
|            | ALH157      | 8.23               | 1.43            | 2.90            | 3.04           | 10.87         | 4.42           | 33.47          | 32.01          |
|            | ANA115      | 6.34               | 0.96            | 2.17            | 2.65           | 5.39          | 3.57           | 43.80          | 26.86          |
|            | BVL130      | 8.07               | 1.45            | 2.70            | 3.37           | 7.63          | 4.77           | 41.29          | 30.15          |
|            | DCP114      | 9.82               | 1.15            | 3.23            | 3.83           | 11.02         | 4.91           | 37.22          | 23.30          |
|            | LYK123      | 8.19               | 1.51            | 2.86            | 3.55           | 8.90          | 5.00           | 37.96          | 30.10          |
|            | OXF122      | 9.85               | 1.14            | 3.17            | 3.67           | 12.41         | 4.75           | 34.55          | 23.83          |
|            | SAL133      | 7.92               | 1.70            | 2.94            | 3.09           | 7.01          | 4.74           | 42.99          | 35.43          |
|            | SND152      | 8.19               | 0.83            | 3.06            | 2.33           | 6.25          | 3.13           | 46.60          | 26.95          |
|            | UVL124      | 5.63               | 1.67            | 2.15            | 2.24           | 4.71          | 3.87           | 44.11          | 43.15          |
|            | VIN140      | 9.77               | 1.81            | 3.05            | 2.87           | 15.99         | 4.64           | 29.00          | 38.95          |
|            | <b>AVE</b>  | <b>7.90</b>        | <b>1.46</b>     | <b>2.72</b>     | <b>2.93</b>    | <b>8.58</b>   | <b>4.34</b>    | <b>39.30</b>   | <b>33.68</b>   |
| STD        | 1.49        | 0.37               | 0.43            | 0.60            | 3.39           | 0.61          | 5.14           | 8.47           |                |
| 3          | ARE128      | 9.10               | 1.05            | 3.05            | 4.08           | 10.55         | 5.06           | 36.62          | 20.73          |
|            | BEL116      | 8.75               | 0.61            | 2.91            | 3.40           | 8.45          | 3.96           | 40.83          | 15.11          |
|            | CDR119      | 9.49               | 0.17            | 2.31            | 1.52           | 6.68          | 1.67           | 48.71          | 10.01          |
|            | CTH110      | 6.67               | 0.42            | 1.92            | 2.75           | 8.84          | 3.13           | 33.50          | 13.39          |
|            | KEF112      | 7.39               | 0.25            | 1.75            | 2.07           | 8.76          | 2.28           | 36.17          | 10.93          |
|            | LRL117      | 9.38               | 0.20            | 2.18            | 2.40           | 12.66         | 2.57           | 33.05          | 7.83           |
|            | MKG113      | 7.94               | 0.54            | 2.35            | 2.98           | 12.32         | 3.47           | 30.05          | 15.43          |
|            | PAR107      | 9.25               | 0.36            | 2.13            | 1.93           | 7.23          | 2.26           | 46.30          | 15.68          |
|            | PSU106      | 8.34               | 0.77            | 2.85            | 2.82           | 9.30          | 3.55           | 37.56          | 21.76          |
|            | WPB104      | 6.23               | 0.30            | 1.74            | 2.62           | 8.14          | 2.88           | 33.79          | 10.40          |
|            | WSP144      | 7.67               | 0.54            | 2.42            | 4.11           | 7.31          | 4.59           | 41.21          | 11.76          |
|            | <b>AVE</b>  | <b>8.20</b>        | <b>0.47</b>     | <b>2.33</b>     | <b>2.79</b>    | <b>9.11</b>   | <b>3.22</b>    | <b>37.98</b>   | <b>13.91</b>   |
| STD        | 1.12        | 0.27               | 0.45            | 0.83            | 1.98           | 1.04          | 5.77           | 4.40           |                |
| 4          | COW137      | 6.44               | 0.13            | 1.55            | 0.80           | 0.98          | 0.91           | 81.66          | 13.70          |
|            | CVL151      | 6.83               | 0.37            | 1.84            | 1.51           | 2.66          | 1.85           | 62.93          | 19.98          |
|            | ESP127      | 8.57               | 0.29            | 2.41            | 1.70           | 3.94          | 1.97           | 59.23          | 14.89          |
|            | GAS153      | 7.90               | 0.32            | 2.19            | 2.09           | 5.42          | 2.38           | 49.50          | 14.17          |
|            | LCW121      | 7.99               | 0.31            | 1.95            | 0.89           | 1.87          | 1.18           | 74.01          | 25.71          |
|            | PED108      | 7.93               | 0.26            | 2.07            | 2.27           | 4.03          | 2.49           | 56.83          | 10.61          |
|            | PNF126      | 7.69               | 0.23            | 1.53            | 1.72           | 2.66          | 1.93           | 65.88          | 12.10          |
|            | SHN418      | 8.12               | 0.24            | 1.94            | 2.77           | 7.06          | 2.96           | 43.53          | 7.95           |
|            | SPD111      | 8.32               | 0.46            | 2.61            | 1.66           | 3.65          | 2.10           | 60.40          | 22.15          |
|            | SUM156      | 5.01               | 0.40            | 0.97            | 1.06           | 1.72          | 1.45           | 66.06          | 29.06          |
|            | VPI120      | 8.92               | 0.53            | 2.04            | 2.69           | 6.39          | 3.17           | 48.34          | 16.55          |
| <b>AVE</b> | <b>7.61</b> | <b>0.32</b>        | <b>1.92</b>     | <b>1.74</b>     | <b>3.67</b>    | <b>2.04</b>   | <b>60.76</b>   | <b>16.99</b>   |                |
| STD        | 1.12        | 0.11               | 0.45            | 0.67            | 1.96           | 0.70          | 11.26          | 6.53           |                |

## (b) Cold season

| Region | STN        | SO <sub>4</sub> <sup>2-</sup> | NO <sub>3</sub> <sup>-</sup> | NH <sub>4</sub> <sup>+</sup> | HNO <sub>3</sub> | SO <sub>2</sub> | TNO <sub>3</sub> | RSO <sub>4</sub> | RNO <sub>3</sub> |
|--------|------------|-------------------------------|------------------------------|------------------------------|------------------|-----------------|------------------|------------------|------------------|
| 1      | ALG100     | 2.20                          | 0.69                         | 0.69                         | 0.94             | 3.48            | 1.61             | 29.74            | 42.19            |
|        | CHA100     | 2.58                          | 0.50                         | 0.72                         | 0.98             | 6.36            | 1.46             | 21.38            | 33.69            |
|        | CPS100     | 1.72                          | 0.09                         | 0.29                         | 0.23             | 2.10            | 0.31             | 35.32            | 27.43            |
|        | KEJ100     | 2.49                          | 0.33                         | 0.43                         | 0.51             | 2.90            | 0.83             | 37.04            | 39.86            |
|        | ASH135     | 2.30                          | 0.32                         | 0.56                         | 0.77             | 3.20            | 1.08             | 32.41            | 30.04            |
|        | WST109     | 2.46                          | 0.29                         | 0.71                         | 1.02             | 3.70            | 1.29             | 30.90            | 21.98            |
|        | <b>AVE</b> | <b>2.29</b>                   | <b>0.37</b>                  | <b>0.57</b>                  | <b>0.74</b>      | <b>3.62</b>     | <b>1.10</b>      | <b>31.13</b>     | <b>32.53</b>     |
|        | STD        | 0.31                          | 0.20                         | 0.17                         | 0.31             | 1.45            | 0.47             | 5.50             | 7.64             |
| 2      | EGB100     | 3.49                          | 3.25                         | 1.86                         | 1.13             | 8.73            | 4.36             | 21.12            | 74.57            |
|        | LON100     | 4.26                          | 4.10                         | 2.30                         | 1.35             | 11.68           | 5.43             | 19.56            | 75.44            |
|        | ALH157     | 4.35                          | 4.18                         | 2.56                         | 1.45             | 15.11           | 5.61             | 16.05            | 74.35            |
|        | ANA115     | 3.79                          | 3.25                         | 2.03                         | 1.70             | 10.88           | 4.92             | 19.04            | 66.00            |
|        | BVL130     | 4.16                          | 4.07                         | 2.37                         | 1.66             | 10.14           | 5.71             | 21.50            | 71.61            |
|        | DCP114     | 4.34                          | 2.53                         | 2.09                         | 2.20             | 14.96           | 4.70             | 16.24            | 53.90            |
|        | LYK123     | 4.29                          | 3.77                         | 2.37                         | 1.80             | 14.02           | 5.54             | 17.07            | 68.08            |
|        | OXF122     | 4.60                          | 2.81                         | 2.23                         | 2.25             | 20.69           | 5.02             | 12.99            | 55.96            |
|        | SAL133     | 4.47                          | 4.99                         | 2.85                         | 1.43             | 12.45           | 6.40             | 19.34            | 77.92            |
|        | UVL124     | 3.62                          | 3.59                         | 2.08                         | 1.29             | 8.55            | 4.86             | 22.05            | 73.84            |
|        | VIN140     | 4.77                          | 3.22                         | 2.25                         | 2.03             | 22.91           | 5.22             | 12.18            | 61.72            |
|        | <b>AVE</b> | <b>4.19</b>                   | <b>3.62</b>                  | <b>2.27</b>                  | <b>1.66</b>      | <b>13.65</b>    | <b>5.25</b>      | <b>17.92</b>     | <b>68.49</b>     |
|        | STD        | 0.40                          | 0.70                         | 0.27                         | 0.37             | 4.64            | 0.56             | 3.32             | 8.18             |
| 3      | ARE128     | 4.63                          | 2.16                         | 2.06                         | 3.04             | 19.54           | 5.16             | 13.73            | 41.75            |
|        | BEL116     | 4.89                          | 1.85                         | 2.11                         | 2.02             | 18.09           | 3.84             | 15.34            | 47.36            |
|        | CDR119     | 4.05                          | 0.38                         | 1.22                         | 1.66             | 15.41           | 2.02             | 15.20            | 18.65            |
|        | CTH110     | 3.62                          | 0.83                         | 1.29                         | 2.77             | 15.20           | 3.56             | 13.70            | 23.04            |
|        | KEF112     | 4.01                          | 0.58                         | 1.27                         | 2.50             | 20.71           | 3.04             | 11.44            | 18.96            |
|        | LRL117     | 4.17                          | 0.54                         | 1.28                         | 2.30             | 25.73           | 2.80             | 9.81             | 18.93            |
|        | MKG113     | 4.32                          | 1.54                         | 1.68                         | 2.38             | 23.46           | 3.88             | 10.95            | 39.45            |
|        | PAR107     | 4.11                          | 0.91                         | 1.16                         | 1.66             | 17.28           | 2.54             | 13.77            | 36.15            |
|        | PSU106     | 4.37                          | 1.73                         | 1.85                         | 2.31             | 20.17           | 4.00             | 12.62            | 43.03            |
|        | WPB104     | 3.89                          | 0.92                         | 1.33                         | 2.28             | 17.62           | 3.17             | 12.96            | 28.91            |
|        | WSP144     | 4.61                          | 1.92                         | 1.90                         | 2.46             | 17.95           | 4.34             | 14.73            | 44.07            |
|        | <b>AVE</b> | <b>4.24</b>                   | <b>1.21</b>                  | <b>1.56</b>                  | <b>2.31</b>      | <b>19.20</b>    | <b>3.49</b>      | <b>13.11</b>     | <b>32.76</b>     |
|        | STD        | 0.37                          | 0.64                         | 0.36                         | 0.42             | 3.22            | 0.89             | 1.78             | 11.28            |
| 4      | COW137     | 2.86                          | 0.22                         | 0.85                         | 0.94             | 2.62            | 1.14             | 42.27            | 19.25            |
|        | CVL151     | 3.57                          | 0.73                         | 1.25                         | 1.53             | 4.90            | 2.24             | 33.09            | 32.83            |
|        | ESP127     | 4.15                          | 0.69                         | 1.40                         | 2.17             | 9.58            | 2.83             | 22.36            | 24.51            |
|        | GAS153     | 3.72                          | 0.61                         | 1.22                         | 2.03             | 9.56            | 2.60             | 21.07            | 23.69            |
|        | LCW121     | 3.69                          | 0.69                         | 0.94                         | 0.80             | 4.91            | 1.47             | 33.96            | 46.89            |
|        | PED108     | 4.18                          | 0.54                         | 1.37                         | 2.51             | 10.40           | 3.01             | 21.21            | 17.86            |
|        | PNF126     | 2.82                          | 0.28                         | 0.82                         | 1.76             | 4.83            | 2.01             | 27.94            | 13.83            |
|        | SHN418     | 3.35                          | 0.47                         | 1.14                         | 2.61             | 11.71           | 3.04             | 16.07            | 15.51            |
|        | SUM156     | 3.77                          | 0.67                         | 0.85                         | 1.07             | 2.84            | 1.72             | 47.02            | 39.01            |
|        | VPI120     | 3.59                          | 0.59                         | 1.07                         | 2.73             | 11.01           | 3.27             | 17.91            | 18.06            |
|        | <b>AVE</b> | <b>3.57</b>                   | <b>0.55</b>                  | <b>1.09</b>                  | <b>1.81</b>      | <b>7.24</b>     | <b>2.33</b>      | <b>28.29</b>     | <b>25.14</b>     |
| STD    | 0.46       | 0.18                          | 0.22                         | 0.71                         | 3.54             | 0.73            | 10.52            | 10.98            |                  |

Table S2. 3 years' averages of air concentrations ( $\mu\text{g m}^{-3}$ ),  $\text{RSO}_4$  (%) and  $\text{RNO}_3$  (%) for 2014-2016. (a) Warm season

| Region     | STN         | $\text{SO}_4^{2-}$ | $\text{NO}_3^-$ | $\text{NH}_4^+$ | $\text{HNO}_3$ | $\text{SO}_2$ | $\text{TNO}_3$ | $\text{RSO}_4$ | $\text{RNO}_3$ |
|------------|-------------|--------------------|-----------------|-----------------|----------------|---------------|----------------|----------------|----------------|
| 1          | CHA100      | 1.10               | 0.16            | 0.36            | 0.26           | 0.63          | 0.42           | 53.74          | 39.11          |
|            | ASH135      | 0.57               | 0.11            | 0.21            | 0.17           | 0.30          | 0.27           | 55.34          | 38.77          |
|            | WST109      | 0.73               | 0.10            | 0.26            | 0.21           | 0.26          | 0.31           | 65.00          | 33.23          |
|            | <b>AVE</b>  | <b>0.80</b>        | <b>0.12</b>     | <b>0.28</b>     | <b>0.21</b>    | <b>0.40</b>   | <b>0.33</b>    | <b>58.03</b>   | <b>37.04</b>   |
|            | STD         | 0.27               | 0.03            | 0.07            | 0.05           | 0.20          | 0.08           | 6.09           | 3.30           |
| 2          | EGB100      | 1.54               | 0.96            | 0.64            | 0.92           | 0.70          | 1.87           | 59.64          | 51.49          |
|            | LON100      | 1.84               | 0.97            | 0.75            | 0.88           | 0.96          | 1.84           | 56.23          | 53.00          |
|            | ALH157      | 1.96               | 0.67            | 0.65            | 1.07           | 1.03          | 1.72           | 55.60          | 38.87          |
|            | ANA115      | 1.54               | 0.34            | 0.52            | 1.05           | 0.90          | 1.37           | 53.13          | 24.60          |
|            | BVL130      | 1.88               | 0.68            | 0.64            | 1.21           | 1.15          | 1.87           | 52.98          | 36.25          |
|            | DCP114      | 2.00               | 0.45            | 0.74            | 1.19           | 1.00          | 1.62           | 57.54          | 27.52          |
|            | OXF122      | 2.09               | 0.49            | 0.75            | 1.21           | 1.38          | 1.68           | 51.10          | 29.12          |
|            | SAL133      | 1.78               | 0.54            | 0.65            | 1.32           | 0.98          | 1.84           | 54.66          | 29.41          |
|            | SND152      | 1.80               | 0.45            | 0.62            | 0.94           | 0.64          | 1.37           | 65.04          | 32.68          |
|            | UVL124      | 1.35               | 0.56            | 0.56            | 1.02           | 0.92          | 1.57           | 49.25          | 35.88          |
|            | VIN140      | 2.33               | 0.73            | 0.73            | 1.05           | 1.70          | 1.76           | 48.21          | 41.31          |
| <b>AVE</b> | <b>1.83</b> | <b>0.62</b>        | <b>0.66</b>     | <b>1.08</b>     | <b>1.03</b>    | <b>1.68</b>   | <b>54.85</b>   | <b>36.38</b>   |                |
| STD        | 0.28        | 0.21               | 0.08            | 0.14            | 0.30           | 0.18          | 4.82           | 9.31           |                |
| 3          | ARE128      | 1.77               | 0.52            | 0.66            | 1.28           | 1.07          | 1.78           | 52.30          | 29.38          |
|            | BEL116      | 1.67               | 0.37            | 0.52            | 1.13           | 0.82          | 1.48           | 57.64          | 25.26          |
|            | CDR119      | 1.89               | 0.10            | 0.63            | 0.41           | 0.48          | 0.50           | 72.12          | 19.34          |
|            | CTH110      | 1.38               | 0.25            | 0.52            | 0.71           | 0.72          | 0.94           | 55.80          | 25.94          |
|            | KEF112      | 1.68               | 0.17            | 0.56            | 0.67           | 0.82          | 0.84           | 58.33          | 20.62          |
|            | LRL117      | 1.94               | 0.15            | 0.65            | 0.65           | 0.77          | 0.78           | 63.09          | 18.69          |
|            | MCK131      | 2.09               | 0.42            | 0.74            | 1.00           | 0.77          | 1.40           | 64.69          | 30.15          |
|            | MKG113      | 1.81               | 0.26            | 0.61            | 0.89           | 0.99          | 1.13           | 55.22          | 22.61          |
|            | PAR107      | 1.92               | 0.18            | 0.60            | 0.55           | 0.47          | 0.71           | 72.83          | 24.74          |
|            | PSU106      | 1.83               | 0.42            | 0.68            | 1.02           | 1.20          | 1.42           | 51.39          | 29.56          |
|            | WSP144      | 1.43               | 0.49            | 0.45            | 1.29           | 0.68          | 1.76           | 58.25          | 27.79          |
|            | <b>AVE</b>  | <b>1.77</b>        | <b>0.30</b>     | <b>0.60</b>     | <b>0.87</b>    | <b>0.80</b>   | <b>1.16</b>    | <b>60.15</b>   | <b>24.92</b>   |
|            | STD         | 0.21               | 0.15            | 0.08            | 0.30           | 0.22          | 0.44           | 7.27           | 4.15           |
| 4          | CND125      | 1.55               | 0.27            | 0.47            | 0.74           | 0.43          | 1.00           | 69.82          | 26.63          |
|            | COW137      | 1.27               | 0.12            | 0.42            | 0.29           | 0.22          | 0.40           | 79.35          | 28.66          |
|            | CVL151      | 1.77               | 0.40            | 0.53            | 0.58           | 0.56          | 0.97           | 67.76          | 41.29          |
|            | ESP127      | 1.86               | 0.18            | 0.53            | 0.63           | 0.40          | 0.80           | 75.41          | 22.53          |
|            | GAS153      | 1.57               | 0.33            | 0.48            | 0.76           | 0.46          | 1.08           | 68.98          | 30.56          |
|            | PED108      | 1.62               | 0.22            | 0.53            | 0.64           | 0.48          | 0.84           | 68.60          | 25.73          |
|            | PNF126      | 1.52               | 0.25            | 0.55            | 0.51           | 0.33          | 0.75           | 75.14          | 32.66          |
|            | SHN418      | 1.65               | 0.31            | 0.58            | 0.78           | 0.59          | 1.08           | 65.04          | 28.54          |
|            | SPD111      | 1.65               | 0.21            | 0.49            | 0.65           | 0.43          | 0.85           | 71.54          | 24.58          |
|            | SUM156      | 1.53               | 0.35            | 0.30            | 0.39           | 0.37          | 0.74           | 73.26          | 47.84          |
|            | VPI120      | 1.84               | 0.30            | 0.62            | 0.71           | 2.20          | 1.00           | 36.24          | 29.82          |
|            | <b>AVE</b>  | <b>1.62</b>        | <b>0.27</b>     | <b>0.50</b>     | <b>0.61</b>    | <b>0.59</b>   | <b>0.86</b>    | <b>68.29</b>   | <b>30.80</b>   |
| STD        | 0.17        | 0.08               | 0.09            | 0.16            | 0.54           | 0.20          | 11.39          | 7.51           |                |

## (b) Cold season

| Region | STN        | SO <sub>4</sub> <sup>2-</sup> | NO <sub>3</sub> <sup>-</sup> | NH <sub>4</sub> <sup>+</sup> | HNO <sub>3</sub> | SO <sub>2</sub> | TNO <sub>3</sub> | RSO <sub>4</sub> | RNO <sub>3</sub> |
|--------|------------|-------------------------------|------------------------------|------------------------------|------------------|-----------------|------------------|------------------|------------------|
| 1      | ALG100     | 0.95                          | 0.72                         | 0.43                         | 0.41             | 0.78            | 1.12             | 44.89            | 64.29            |
|        | CHA100     | 0.83                          | 0.55                         | 0.35                         | 0.33             | 1.30            | 0.87             | 29.95            | 62.60            |
|        | KEJ100     | 0.93                          | 0.35                         | 0.21                         | 0.13             | 0.32            | 0.48             | 65.95            | 72.58            |
|        | ASH135     | 0.81                          | 0.31                         | 0.28                         | 0.20             | 0.67            | 0.51             | 44.45            | 61.49            |
|        | WST109     | 0.84                          | 0.30                         | 0.32                         | 0.28             | 0.66            | 0.57             | 46.02            | 51.77            |
|        | <b>AVE</b> | <b>0.87</b>                   | <b>0.44</b>                  | <b>0.32</b>                  | <b>0.27</b>      | <b>0.75</b>     | <b>0.71</b>      | <b>46.25</b>     | <b>62.54</b>     |
|        | STD        | 0.06                          | 0.18                         | 0.08                         | 0.11             | 0.36            | 0.28             | 12.83            | 7.43             |
| 2      | EGB100     | 1.40                          | 2.31                         | 1.02                         | 0.47             | 1.63            | 2.77             | 36.28            | 83.41            |
|        | LON100     | 1.73                          | 3.08                         | 1.36                         | 0.50             | 2.51            | 3.58             | 31.94            | 86.17            |
|        | ALH157     | 1.71                          | 2.53                         | 1.13                         | 0.79             | 1.79            | 3.30             | 39.09            | 76.09            |
|        | ANA115     | 1.59                          | 2.34                         | 1.07                         | 0.77             | 1.73            | 3.09             | 38.51            | 75.40            |
|        | BVL130     | 1.65                          | 2.79                         | 1.22                         | 0.75             | 1.93            | 3.53             | 37.60            | 78.57            |
|        | DCP114     | 1.81                          | 2.16                         | 1.13                         | 0.95             | 2.38            | 3.09             | 34.69            | 69.48            |
|        | OXF122     | 1.81                          | 2.23                         | 1.13                         | 0.91             | 3.08            | 3.13             | 30.45            | 70.99            |
|        | SAL133     | 1.74                          | 3.14                         | 1.38                         | 0.75             | 1.86            | 3.88             | 39.13            | 80.47            |
|        | UVL124     | 1.43                          | 2.37                         | 1.05                         | 0.59             | 1.76            | 2.95             | 35.22            | 80.24            |
|        | VIN140     | 1.86                          | 2.27                         | 1.12                         | 0.86             | 3.20            | 3.12             | 28.93            | 72.06            |
|        | <b>AVE</b> | <b>1.67</b>                   | <b>2.52</b>                  | <b>1.16</b>                  | <b>0.73</b>      | <b>2.19</b>     | <b>3.24</b>      | <b>35.18</b>     | <b>77.29</b>     |
| STD    | 0.16       | 0.36                          | 0.12                         | 0.16                         | 0.58             | 0.33            | 3.67             | 5.47             |                  |
| 3      | ARE128     | 1.65                          | 1.90                         | 0.99                         | 1.08             | 2.63            | 2.97             | 30.40            | 64.03            |
|        | BEL116     | 1.70                          | 1.41                         | 0.80                         | 1.00             | 2.12            | 2.39             | 35.90            | 58.90            |
|        | CDR119     | 1.58                          | 0.45                         | 0.59                         | 0.62             | 1.50            | 1.06             | 43.58            | 42.59            |
|        | CTH110     | 1.28                          | 1.07                         | 0.65                         | 0.68             | 1.61            | 1.74             | 35.16            | 60.83            |
|        | KEF112     | 1.50                          | 0.87                         | 0.66                         | 0.78             | 2.40            | 1.64             | 30.72            | 52.76            |
|        | MCK131     | 1.78                          | 1.35                         | 0.89                         | 1.09             | 1.81            | 2.42             | 40.68            | 55.45            |
|        | MKG113     | 1.70                          | 1.44                         | 0.84                         | 0.85             | 2.87            | 2.28             | 29.15            | 62.32            |
|        | PAR107     | 1.61                          | 0.71                         | 0.55                         | 0.61             | 1.58            | 1.31             | 41.67            | 54.01            |
|        | PSU106     | 1.68                          | 1.65                         | 0.96                         | 0.78             | 3.35            | 2.41             | 26.74            | 67.91            |
|        | WSP144     | 1.45                          | 1.63                         | 0.76                         | 1.07             | 1.85            | 2.68             | 35.14            | 60.68            |
|        | <b>AVE</b> | <b>1.59</b>                   | <b>1.25</b>                  | <b>0.77</b>                  | <b>0.86</b>      | <b>2.17</b>     | <b>2.09</b>      | <b>34.91</b>     | <b>57.95</b>     |
| STD    | 0.15       | 0.46                          | 0.15                         | 0.19                         | 0.62             | 0.62            | 5.71             | 7.12             |                  |
| 4      | CND125     | 1.40                          | 0.68                         | 0.57                         | 0.77             | 0.92            | 1.44             | 50.62            | 47.32            |
|        | COW137     | 0.99                          | 0.28                         | 0.39                         | 0.39             | 0.44            | 0.66             | 60.31            | 41.31            |
|        | CVL151     | 1.55                          | 0.54                         | 0.56                         | 0.69             | 0.93            | 1.22             | 52.31            | 44.51            |
|        | ESP127     | 1.63                          | 0.68                         | 0.64                         | 0.90             | 1.09            | 1.57             | 50.56            | 43.32            |
|        | GAS153     | 1.42                          | 0.50                         | 0.52                         | 0.90             | 1.06            | 1.38             | 47.77            | 35.99            |
|        | PED108     | 1.40                          | 0.53                         | 0.56                         | 0.77             | 1.18            | 1.29             | 45.22            | 40.94            |
|        | PNF126     | 1.06                          | 0.44                         | 0.43                         | 0.60             | 0.74            | 1.03             | 48.76            | 42.37            |
|        | SHN418     | 1.12                          | 0.70                         | 0.50                         | 0.71             | 1.21            | 1.40             | 39.05            | 49.77            |
|        | SPD111     | 1.50                          | 0.73                         | 0.62                         | 0.71             | 0.96            | 1.43             | 51.72            | 50.86            |
|        | SUM156     | 1.52                          | 0.43                         | 0.34                         | 0.43             | 0.52            | 0.85             | 66.24            | 49.03            |
|        | VPI120     | 1.38                          | 0.52                         | 0.52                         | 0.97             | 3.41            | 1.47             | 21.26            | 35.37            |
|        | <b>AVE</b> | <b>1.36</b>                   | <b>0.55</b>                  | <b>0.51</b>                  | <b>0.71</b>      | <b>1.13</b>     | <b>1.25</b>      | <b>48.53</b>     | <b>43.71</b>     |
| STD    | 0.21       | 0.14                          | 0.10                         | 0.18                         | 0.80             | 0.29            | 11.53            | 5.24             |                  |
